# Supplementary material
Source: PubMed Central journal article supplement (PMC5839717)

# A Results of Nonguided Insertions of Electrodes Through a Cochleostomy Proxy

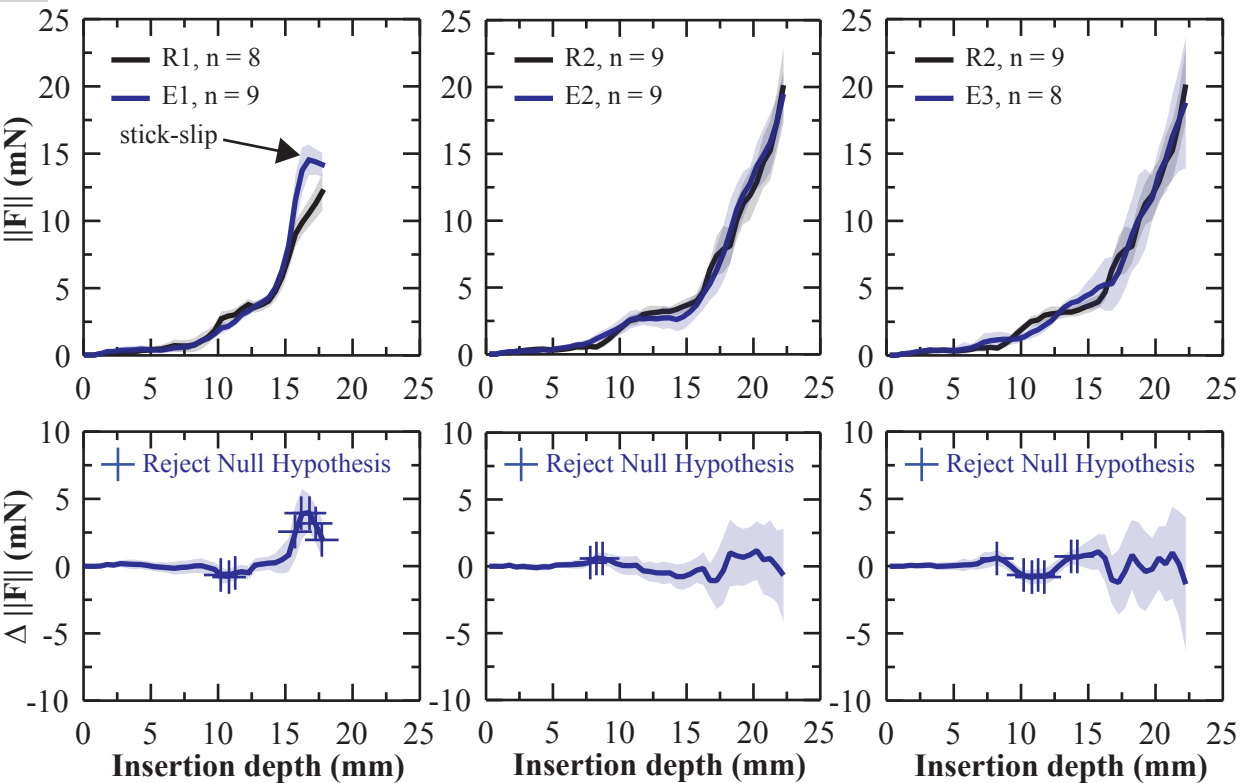

# B Image Sequence of a Typical Nonguided Insertion of R2

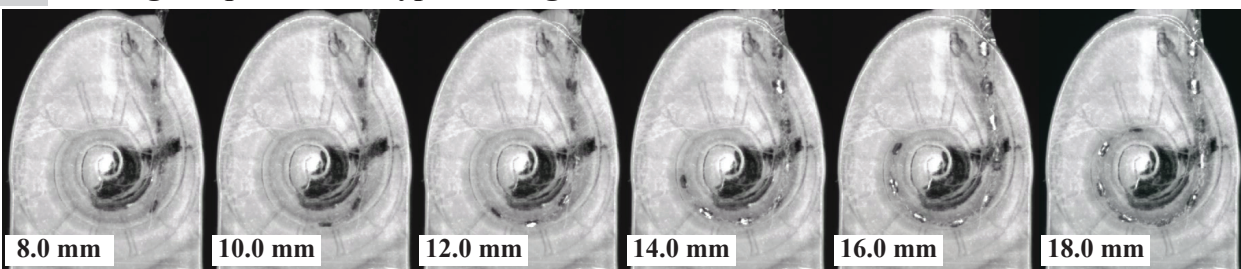

Supplement: mao-39-e63-s005.pdf [file mao-39-e63-s005.pdf]
