# Supplementary material
Source: PubMed Central journal article supplement (PMC5839717)

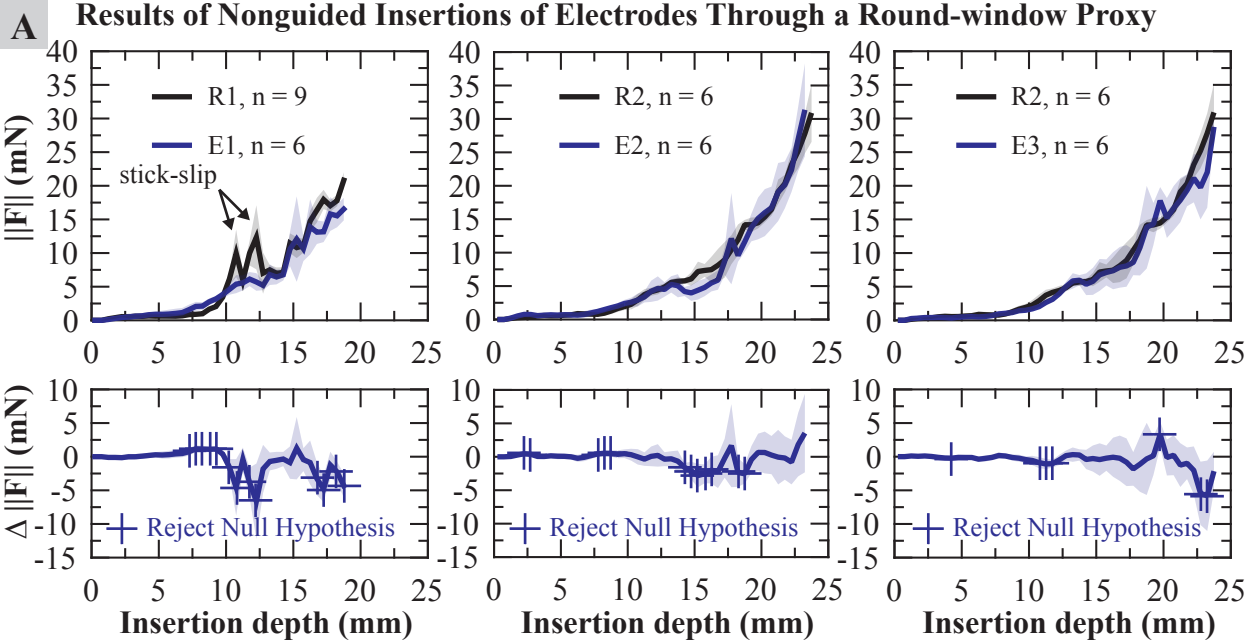

| E1 - R1     |                           | E2 - R2     |                           | E3 - R2     |                           |
|-------------|---------------------------|-------------|---------------------------|-------------|---------------------------|
| Depth (mm)  | $\Delta\ F\ _{\max}$ (mN) | Depth (mm)  | $\Delta\ F\ _{\max}$ (mN) | Depth (mm)  | $\Delta\ F\ _{\max}$ (mN) |
| 7.0 - 9.5   | 1.2                       | 2.0 - 3.0   | 0.5                       | 4.0 - 4.5   | 0.2                       |
| 10.0 - 12.5 | 6.7                       | 7.5 - 9.0   | 0.6                       | 10.5 - 12.0 | 1.1                       |
| 16.5 - 19.0 | 4.8                       | 14.0 - 16.5 | 2.8                       | 19.5 - 20.0 | 3.3                       |
|             |                           | 18.0 - 19.0 | 2.6                       | 22.5 - 23.5 | 5.8                       |

**B Image Sequence of a Typical Nonguided Insertion of R2 Through the Cochlear Hook**

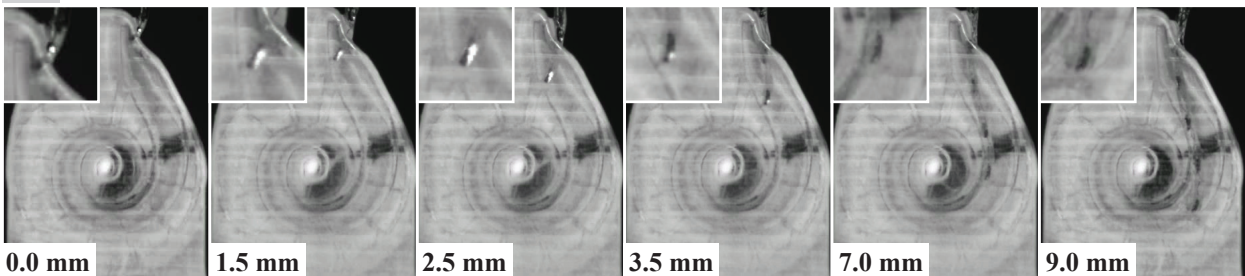

Supplement: mao-39-e63-s006.pdf [file mao-39-e63-s006.pdf]
