# Supplementary material
Source: PubMed Central journal article supplement (PMC5839717)

# Sequence of Images Demonstrating Initial Contact of E2 with Lateral Wall

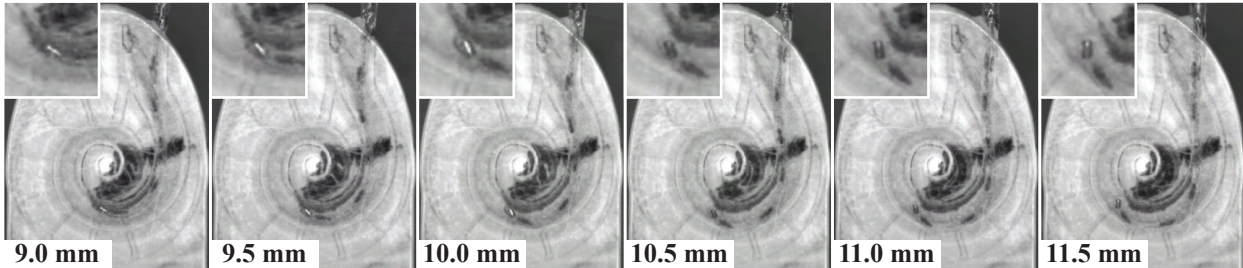

Supplement: mao-39-e63-s001.pdf [file mao-39-e63-s001.pdf]

### Cochleostomy E1 Guided

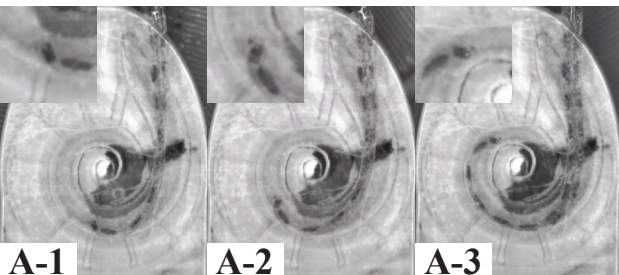

### Round-Window E2 Guided

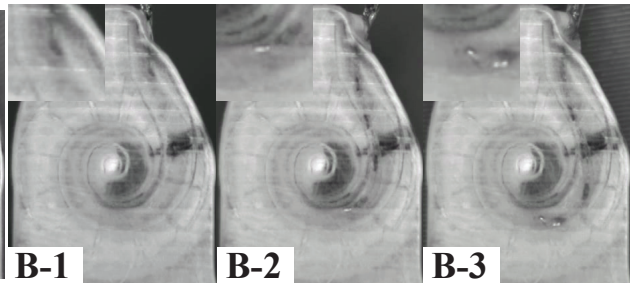

### Cochleostomy E3 Guided

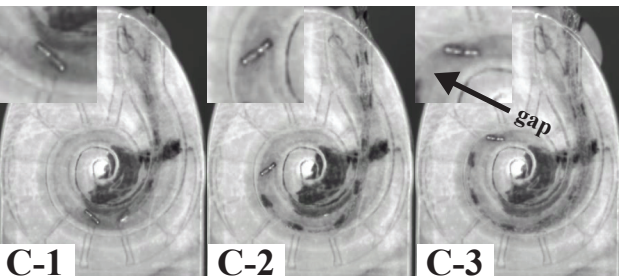

### Round-Window E3 Guided

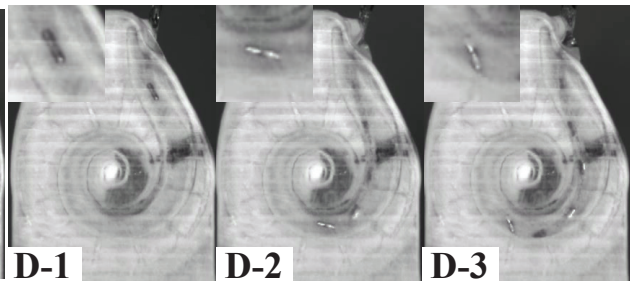

Supplement: mao-39-e63-s002.pdf [file mao-39-e63-s002.pdf]

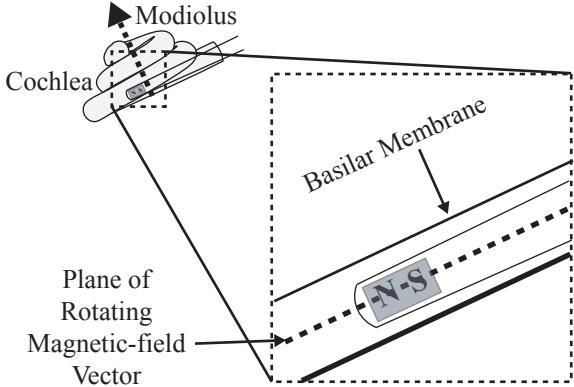

Supplement: mao-39-e63-s007.pdf [file mao-39-e63-s007.pdf]
